# Supplementary material
Source: PubMed Central journal article supplement (PMC7781187)
Supplement: NIHMS1655794-supplement-OSF_information.pdf [file NIHMS1655794-supplement-OSF_information.pdf]

## **Data and Code Availability**

Processed behavioral and fMRI data supporting the primary findings of this study are available at Open Science Framework; project: <https://osf.io/2n8ew/>. Additionally, experimental task scripts and analysis files will also be made available at this repository site at the time of publication. Investigators interested in obtaining raw behavioral and fMRI data should contact the corresponding author.
